# Supplementary material for: A Systematic Review and Meta-Analysis on the Efficacy of Locally Delivered Adjunctive Curcumin (Curcuma longa L.) in the Treatment of Periodontitis
Source: MDPI journal article supplement (doi:10.3390/biomedicines11020481), 2023-02-07
Supplement: s1 [file s1]

## Supplementary Material

Table S1. Search strategies for each database and search results.

| 1.Pubmed                   |                                                                                         |         |
|----------------------------|-----------------------------------------------------------------------------------------|---------|
| Search number              | Search                                                                                  | Results |
| 1                          | "Periodontitis"[Mesh] OR "Periodontal Diseases"<br>[Mesh:NoExp]                         | 56,466  |
| 2                          | periodontitis[Title/Abstract] OR<br>periodontal[Title/Abstract]                         | 78,106  |
| 3                          | #1 OR #2                                                                                | 94,321  |
| 4                          | "Curcuma"[Mesh] OR "Curcumin"[Mesh] OR "turmeric<br>extract"<br>[Supplementary Concept] | 14,607  |
| 5                          | turmeric[Title/Abstract] OR curcumin[Title/Abstract]                                    | 19,415  |
| 6                          | #4 OR #5                                                                                | 20,957  |
| 7                          | #3 AND #6                                                                               | 158     |
| 8                          | #7 NOT ("Animals"[Mesh] NOT "Humans"[Mesh])                                             | 133     |
| 2.Cochrane Library (Wiley) |                                                                                         |         |
| Search number              | Search                                                                                  | Results |
| #1                         | [mh Periodontitis] OR [mh ^"Periodontal Diseases"]                                      | 3667    |
| #2                         | periodontitis:ti,ab,kw OR periodontal:ti,ab,kw                                          | 12206   |
| #3                         | #1 OR #2                                                                                | 12243   |
| #4                         | [mh Curcuma] OR [mh Curcumin]                                                           | 567     |
| #5                         | turmeric:ti,ab,kw OR curcumin:ti,ab,kw OR<br>curcuma:ti,ab,kw                           | 1913    |

|                                                                               |                                                                                                            |         |
|-------------------------------------------------------------------------------|------------------------------------------------------------------------------------------------------------|---------|
| #6                                                                            | #4 OR #5                                                                                                   | 1913    |
| #7                                                                            | #3 AND #6                                                                                                  | 79      |
| <b>3. BASE (base-search.net)</b>                                              |                                                                                                            |         |
|                                                                               | Search                                                                                                     | Results |
|                                                                               | (periodontitis periodontal) AND (turmeric curcumin)                                                        | 305     |
| <b>4. ClinicalTrial.gov</b>                                                   |                                                                                                            |         |
|                                                                               | Search                                                                                                     | Results |
|                                                                               | Condition: periodontitis OR periodontal                                                                    | 7       |
|                                                                               | Intervention: turmeric OR curcumin OR curcuma                                                              |         |
| <b>5. LIVIVO</b>                                                              | Search                                                                                                     | Results |
|                                                                               | (periodontitis OR periodontal) AND (turmeric OR curcumin)                                                  | 191     |
| <b>6. Dentistry Oral Sciences Source (Ebsco) and MEDLINE Complete (Ebsco)</b> | Search                                                                                                     | Results |
|                                                                               | (periodontal OR periodontitis) AND (curcumin OR turmeric OR curcuma) AND (randomized OR rtc OR randomised) | 55      |
| <b>7. Scopus.com (Elsevier)</b>                                               | Search                                                                                                     | Results |
|                                                                               | TITLE-ABS-KEY ( ( periodontitis OR periodontal ) AND ( turmeric OR curcumin ) AND random* )                | 54      |
